# Supplementary material for: Functional ANOVA for Carbon Flux Estimates from Remote Sensing Data
Source: Copernicus journal article supplement (doi:10.5194/gmd-2022-230), 2022-11-14
Supplement: Supplementary file [file gmd-2022-230-AC2-supplement.pdf]

# Manuscript: Functional ANOVA for Carbon Flux Estimates from Remote Sensing Data

J. Hobbs, M. Katzfuss, H. Nguyen, V. Yadav, J. Liu

August 2023

## 2 Responses to Reviewer 2 (RC2)

### 2.1 Major comments

- **This study applies a functional ANOVA (analysis of variance) method to extract spatially-varying effects related to different experimental factors from carbon dioxide inversion results. The ideas are not completely new, but some computationally efficient tricks are introduced, and the methodology is applied to a few different questions in the context of interpreting fluxes from atmospheric inversions. The goal is to quantify the impact of different sources of data, different methods of data aggregation, and the use of different inversion models. The code has been made public, and appears to be sufficiently documented. (I did not replicate the results, but a cursory inspection of the code repository suggests that this would be possible.) The study is generally well written, and the figures are of high quality. The subject matter is appropriate for publication in GMD once some issues are addressed.**

We appreciate the reviewer’s assessment of the work and its context within the existing literature. The insightful comments have motivated revisions in our approach and presentation in this manuscript.

- **A significant concern about the methodology is related to the use of adjacent months (June, July, and August) as independent replicates to represent the accumulated JJA signal. This seems questionable in two regards:**
  1. **These are not truly independent:** There is certainly some correlation between the fluxes of adjacent months, in terms of the data constraint, the geophysical processes involved, and likely even the optimization of the fluxes via a 4DVar approach. This is indeed an important point regarding the functional ANOVA model used in the first version of the manuscript, and we have revisited the methodology after receiving similar comments from both reviewers. The revised functional ANOVA model is defined in Section 3.1 and allows for temporal correlation in the error terms  $\epsilon_{ijk}(\mathbf{s})$ . The resulting estimates for the temporal correlation parameters are discussed with the other results in Section 4. It should also be noted that this temporal correlation is for the error/residual after accounting for the remaining ANOVA terms, which are constant in time and vary across space. The estimated temporal correlation parameters are relatively small but impact the inference for the ANOVA terms to some degree.
  2. **These are not realizations of the same quantity:** The fluxes for June are not a replicate of the fluxes for August, due to both seasonal cycles (as can be clearly seen in the columns of Figure 1) and differences in short-term anomalies (e.g. June could be anomalously hot and dry while August of the same year could be anomalously cool and wet).

This point may speak to a benefit in using the flux increments in the functional ANOVA. This approach accounts for some of the seasonal evolution that is also present in the prior fluxes. This choice represents a compromise that facilitates analysis of the intraseasonal variability to identify some coherent spatial patterns, which are present for some of the remaining ANOVA components (overall mean and main effects) for the examples. Indeed short-term anomalies within a season can be present and these would be realized in the error process. The relatively small magnitudes of spatio-temporal correlation in the error process parameters would suggest that any large-scale short-term anomalies might be dominated by other sources of variation in the residual.

**Both of these points call into question whether this choice is valid. This is rather different than the previous studies mentioned in the conclusion, which used different years (not adjacent months!) to infer spatially-varying climate signals and model effects in the presence of interannual variability. (The studies cited that analyzed climate models also used an order of magnitude more replicates.)**

The modification of the model to include temporal correlation for adjacent months, along with use of flux deviations from the assumed prior, help address these important challenges in the examples presented. The reviewer notes the important distinction in defining pseudo-replicates in the current study versus other instances in the literature. We have highlighted this distinction in the revised manuscript’s discussion of the functional ANOVA model in Section 3.1.

- **The findings seem to suggest that, indeed, these are not appropriate to use as replicates. Lines 242 and 243 point out that the estimated GP standard deviation for the is largest for the error fields (10 times larger, in fact), which indicates that the month-to-month variability within each treatment combination is rather large. Indeed, the standard deviation of the error term is largest for all the experiments, as seen in Tables 3 and 4. This is discussed in the conclusion, with the remark that such a “low-replication, high-variance scenario often translates to higher uncertainty in the other ANOVA effects and a tendency for them to shrink to the assumed population mean”, namely zero. Is there a way that the study could have been conceived in order to have a larger number of replicates?**

The large variance of the error process is indeed a common characteristic across all of the examples presented. We note that this is a result of not only high month-to-month variation, but also spatial variability at local scales after accounting for the other ANOVA effects. This does not necessarily invalidate the methodology in a strict sense, rather it is a characteristic of the data, and it is not an uncommon occurrence in classical ANOVA. The functional ANOVA is able to borrow strength via spatial correlation to some extent, but the large error standard deviation is a challenge for the power to detect meaningful signals for the remaining factors. The comment about alternative formulations is appreciated. For the OCO-2 MIP, additional analysis could make use of the multiple years in the datasets. Given the results from the CMS-Flux inversions for the fused product study, the ANOVA would likely need to consider a factor for interannual variability. This additional model complexity is possible, but we think would detract from the existing messages in the analysis in this paper.

- **Regardless, the authors argue that they have been able to extract “significant anomalies”. It is unclear to me how to judge the significance of these results. Is it just because there are coherent spatial patterns? The 95% credible intervals are generally smaller for the error than for the mean,  $\alpha$ ,  $\beta$ , or interaction terms – does this say something about the relative significance of the results?**

This remark underscores the importance in communicating multiple aspects of the functional ANOVA results, which we seek to improve in the revised manuscript. In the revised Results section, we have added a paragraph that outlines the two broad categories of quantities we examine from the functional

ANOVA inference. The first category is the covariance parameters reported in Tables 3-4. Since these parameters summarize the collective spatial and spatio-temporal variability of each factor, it is useful to contrast their values, and the implications for their spatial coherence, across the factors, as discussed in the Results. In fact, the capability of the method to partition the spatial coherence of the various factors is a key capability. While noteworthy, the actual width of the credible intervals is largely a function of the number of spatial fields that inform the estimates. This is analogous to degrees of freedom in traditional ANOVA. All of the pseudo-replicate monthly fields inform the error process parameters, so they are estimated precisely relative to the  $\alpha$ ,  $\beta$ , and interaction parameters.

The second collection of results is the set of maps of the ANOVA components. In cases where the pointwise intervals are shown (Figures 8 and 11), areas with intervals that do not contain zero represent a significant anomaly/deviation.

- **The authors argue that the large standard deviation of the error fields is offset by the relatively small estimated range parameter of the error term. How is this distance to be interpreted? In some cases, the range parameter is significantly smaller than the size of the models' pixels (e.g. a median value of 70.5 km for the range parameter of the error for the African region in Table 4, compared to model resolutions an order of magnitude larger, from  $4^\circ \times 5^\circ$  to  $6.7^\circ \times 6.7^\circ$ , based on Table 1 of Peiro et al., 2022). It would be helpful to provide some more information about how to interpret these numbers. As another example, the unitless smoothing parameter is reported in the tables, but these results are never discussed in the text. What do these mean?**

There are two aspects of this comment that we have attempted to address in the revised manuscript. The first has to do with the resolution of the MIP flux estimates. The modeling teams all provided gridded fluxes at  $1^\circ \times 1^\circ$ , and these are the datasets provided publicly and analyzed in this study.

The second aspect we address is the interpretation of the covariance parameters. The Matérn range and smoothness parameters combine to characterize how correlation between spatial locations decays with separation distance. For an exponential model with smoothness  $\nu = 0.5$ , the range parameter is the distance at which the correlation reaches  $1/e$ . For larger values of  $\nu$ , the correlations decay more slowly at shorter distances. Theoretically, the smoothness identifies the degree of differentiability of the Gaussian process.

We have added some of this practical interpretation to the revised manuscript when the Matérn covariance is introduced in Section 3.1.

- **I think it would be useful to include some discussion about the similarities and the differences between your approach (and results) and those of Cressie et al. (2022). The latter study applied ANOVA to the same two years of very similar OCO-2 MIP results (a previous iteration), also using individual months of a three-month season as replicates (which seems questionable in their study as well). The application was different, however, as they were using it to develop an optimally-weighted multi-model mean for regional fluxes, and considered all seasons and regions covering the whole globe.**

We appreciate both reviewers raising the importance of framing the functional ANOVA approach and results in the context of the recent contribution from Cressie, Bertolacci, and Zammit-Mangion (2022). In the revised manuscript, we have added a sentence at the above location in the Introduction to highlight our contribution. Further, the connection to Cressie et al. is highlighted again in the first two paragraphs of the Conclusions.

- **This raises the question: why did you decide to focus on JJA, and why only on this one season? How would you expect the results to change if different seasons were analyzed? Why did you only use two years of data, when the OCO-2 MIP results you are using**

(from Peiro et al., 2022) provide four full years of valid results? What led you to look only at these specific regions? There is some discussion of why North America and Africa were chosen to illustrate the technique, due to contrasting measurement coverage, but there is no clear argument as to why Eurasia was chosen for the first part of the study. Providing a justification for why a given region was chosen to explore the specific question would make the scientific results more compelling.

In selecting the use cases for demonstrating the functional ANOVA, we sought a balance among multiple objectives for the study. These included motivating carbon cycle questions from the OCO-2 MIP and other recent investigations, motivating questions about sensitivity to data sources/algorithms from the MEaSUREs data fusion effort, and a focus on a parsimonious presentation for a GMD manuscript on assessment of models. This latter objective, along with an interest in the spatial modeling aspect of the functional ANOVA, led to the focus on a single season across different continents. In addition, JJA is a period with recent impactful carbon cycle perturbations and yields sizable uncertainty in MIP consensus flux estimates (Cressie et al., 2022). For the OCO-2 MIP, the interannual variability aspect could be investigated, but this would likely require an additional ANOVA factor. This is feasible but we have kept the analysis to two factors for (relative) simplicity of illustration. We have added further discussion of the carbon cycle science and algorithmic motivation for these choices in the descriptions of the datasets in Section 2 of the revised manuscript.

- **In general, more scientific interpretation of the spatial patterns that are presented as results would improve the paper. In particular: in the plots of the “Data Source Effect” in Figures 7 and 10, how do these patterns correspond to the location of in situ measurement sites? (Yes, the stations are shown in Figure 1 of Peiro et al. (2022), but putting the site locations onto your figures would make this easier to interpret.) Where is there persistent cloud cover and/or good retrievals of OCO-2 data in North America and Africa during the period in question? Interpreting the structure of these “Data Source Effect” figures with reference to the measurements would be helpful.**

We appreciate the suggestions and have implemented several of the points above. We have added in situ locations to Figures 7, 10, and 11 in the revised manuscript. The discussion of the data source differences for Africa includes a mention of reduced data density for OCO-2 over the same area.

- **Another concern regarding the methodology is related to the fact that all the ANOVA analysis in the MIP portion of the study is done on the flux increment, i.e. the posterior flux minus the prior flux for a given space and time, as shown in Equation 1. I believe that this is problematic, because the four models whose results are compared do not have identical priors. All the inversions are constrained by the same data, and we would expect that if transport is perfect, the data constraint is sufficient, and errors are well-characterized, the four models should converge to the same posterior fluxes. That does not mean that their flux increments will be the same. Consider a case where the prior of model A is biased systematically high over a given region, while the prior of model B is biased systematically low. Both models converge to the same response, but when analyzing the increment ( $y_{ijk}(s) - y_{ijk}(0)(s)$ ), model A’s would be negative and model B’s would be positive. If the biases were equally biased, the “consensus flux anomaly” of this ensemble of two would be zero. This is written in the text, e.g. in lines 283-284: “Noting again that the analysis is carried out the inversions’ deviations from their respective priors, the map depicts a consensus flux anomaly from the collection of inversions analyzed.” How can we interpret a “consensus flux anomaly” when the models are starting from different priors? (This does not apply to the first part of the study, only the MIP results.)**

We appreciate the thorough exposition of this comment. The reviewer has outlined some of the

key challenges in the interpretation of some of the ANOVA components when analyzing the flux increments, particularly for the OCO-2 MIP examples. There are pros and cons to analyzing the flux increments with this approach, and we have further outlined the motivation for this choice in the definition of the functional ANOVA model in Section 3. Statistical modeling traditionally introduces spatio-temporal correlation after accounting for systematic patterns in space and time, and the prior fluxes are a reasonable representation of these systematic structures. For the flux MIP examples, we have noted in the revised manuscript that the inferred model effects are a combination of imperfect transport, prior flux differences, and other algorithm and processing artifacts. We also note that these estimated model effects are useful as a diagnostic for individual modeling groups within the MIP collection. Finally, the estimated overall mean field does exhibit mixed results, but some regions exhibit mean increments in the presence of prior fluxes of the same sign.

- **Going back to the theoretical model A and model B from before: these increments would presumably show up as negative and positive flux model differences with a large spatial range, perhaps similar to the all-red (Ames) and all-blue (CMS-Flux) posterior mean maps seen for  $\alpha$  for JJA in North America (Figure 7). However, the authors attribute this to “large-scale regional flux differences among inversion systems with different driving atmospheric transport” (L275-276). This could be the case, but without having common priors, the effects of different priors and different transport cannot be teased apart using this method. Ideally, such an analysis would be carried out on inversion results with identical priors, so that we could truly say something about the influence of the transport model and optimization. Lacking that, this limitation needs to be made completely clear, so that the reader is not misled.**

This is a further important observation about the use of the flux increments in the analysis. In the revised manuscript, we have added further exposition on this point in the discussion of the methodology, results, and conclusions. Specific revisions include:

- Functional ANOVA (Section 3): The revised manuscript includes an additional paragraph after Equation 1. This discussion provides additional methodological and practical motivation for analyzing the flux increments. The different MIP modeling groups’ processing resulted in small-scale artifacts in prior and posterior fluxes that were not as evident in the flux increments. Further, as noted in a previous comment, large-scale spatial and temporal patterns are common in the prior and posterior fluxes, and common intra-seasonal signals can be uncovered in the flux increments.
- Results (Section 4): The discussion of the OCO-2 flux MIP results has been modified. In discussing Table 4, we have added a remark, “Further, since the statistical model is applied to the flux increments, prior flux differences contribute to the model effects.” In addition, discussion of Figure 6 later, we have added, “the patterns can be a combination of difference in prior fluxes, as well as other aspects of the inversions, particularly atmospheric transport.”
- Conclusions (Section 5): The revised manuscript includes an additional paragraph discussing the limitations of analyzing the flux increments in the MIP experiments. This discussion mentions that the ANOVA model effects could result from combinations of differences in transport, prior, and additional inversion system implementation choices. Some additional remarks on multi-model experiment design, particularly implementing common priors, are included.

Finally, we have adopted the reviewer’s use of the term *flux increment* in discussing this approach in the revised manuscript.

- **As a more minor/technical note: The treatment of the different spatial resolutions in the MIP part of the study should be explicitly explained. For the first part of the study, only results from the CMS-Flux model are used, and the plots appear to match the 4°x5°**

resolution of the model. For the MIP, models of different resolutions are compared (but none with a higher resolution than the still relatively coarse  $4^\circ \times 5^\circ$  resolution of CMS-Flux), but the data appear to have been resampled onto a higher spatial grid in Figures 6, 8 and 9. In Figures 7, 10 and 11, the resolution appears smoother still. What procedure was followed?

The revised manuscript includes additional details about the spatial resolution for the flux estimates. These details are provided in the dataset descriptions in Section 2. The fluxes from the fused CO<sub>2</sub> experiments with the CMS-Flux system are available at  $4^\circ \times 5^\circ$  resolution.

For the OCO-2 flux MIP, the modeling groups all provided gridded fluxes at  $1^\circ \times 1^\circ$  resolution, and this is noted at the end of Section 2 in the revised manuscript. These datasets on a common grid are the products that have been provided to the community from the flux MIP and were the data source for the functional ANOVA. Modeling groups implemented their own re-gridding approaches, and this is another potential contributor to model effects in the functional ANOVA. As noted in a previous response and in Section 3 of the revised manuscript, exploratory analysis indicated that the flux increments exhibited fewer local artifacts due to re-gridding.

Finally, the smooth appearance in Figures 7, 10, 11 is mostly the result of the relatively large spatial ranges estimated for the model and data source effects for both MIP functional ANOVA examples. The plots are produced at the  $1^\circ \times 1^\circ$  resolution in the same fashion as other maps from the MIP examples.

## 2.2 Minor Comments

- **L1-2: This sentence is a bit odd, making it sound as if measurements made today (present tense) span several years. Perhaps: “has now produced atmospheric greenhouse gas concentration estimates covering a period of several years”?**

This change has been made in the revised manuscript.

- **L8: Not clear what is meant by “mode differences” here.**

The term has been removed from the updated abstract to provide additional clarity on the results of the CMS-Flux example over Eurasia.

- **L10: For inversions over different continents, or for fluxes over different continents?**

Fluxes is the appropriate word. This has been changed in the revised manuscript.

- **L17: The language here makes it sound as if the satellites are providing an estimate of global CO<sub>2</sub> concentrations frequently, which is not the case. Instead of “frequent”, perhaps quantify it? How many good quality measurements per year, on average?**

We have modified this discussion slightly in the revised manuscript to address this and the following comment. We have included information on the annual data volume for OCO-2.

- **L18: Has flux inversion become demonstrably more tractable (not quite sure what that means here) and precise due to satellite measurements? If so, please provide a reference providing evidence of this!**

This was unintentional phrasing in the original manuscript. Our primary intention was to provide some context for contrasts in the pre-processing/use of satellite data versus in situ observations in flux inversions. The revised manuscript provides additional emphasis on this aspect by mentioning the use of spatially-aggregated satellite products in global inversions.

- **L24-25: Not clear what is meant by “dependence can be exploited in quantifying uncertainty”. Dependence of what on what? Please explain.**

This was intended to be spatio-temporal dependence. It has been rephrased as “characterizing spatio-temporal correlation is necessary in quantifying uncertainty” in the revised manuscript.

- **L39: collection Earth** → **“collection of Earth”**

This change has been made in the revised manuscript.

- **L41: Hyphenate “multiple-component” as a compound adjective, also “spatially-aggregated” on L45.**

This change has been made in the revised manuscript.

- **L47: with associated** → **“with an associated”**

This change has been made in the revised manuscript.

- **L55: Is the year missing from Sain et al. reference here? Is this consistent with the Copernicus style guide?**

The year for the reference has been added in the revised manuscript.

- **L56: Would replace the comma with a period here, breaking into two sentences. (Or at least a semicolon.)**

This has been split into two sentences in the revised manuscript.

- **L57: Would be easier to parse if “used in the current work” were preceded and followed by a comma.**

The commas have been added in the revised manuscript.

- **L70: Which version of ACOS?**

In the revised manuscript, we have noted that the examples in this paper are based on the OCO-2 Version 9 products.

- **L73-75: Please clarify about the creation of super-observations through aggregation. How it’s written here, it sounds as if the data are aggregated across the whole orbit. Aggregation to superobservations is not the same as what is generally considered a L3 product, which is rather gap-filled concentration fields, perhaps through data assimilation to optimize atmospheric state (instead of fluxes). This is explained further in 2.1, but seems inconsistent with what is written here.**

This description was somewhat unclear as written, and in the revised manuscript, we have clarified that all of the aggregation approaches used produce estimates over some type of regular grid, which is  $1^\circ \times 1^\circ$  in the case of the fused products.

- **L101: What is SSDF? I believe this has not been defined.**

We intended to drop the SSDF acronym from the manuscript. The revised manuscript has removed this item.

- **L103: variables of interest?**

This change has been made in the revised manuscript.

- **L120: Perhaps specify that you mean ACOS version 9?**

We have added this note in the revised manuscript.

- **Caption Figure 2: remove “based”**

This change has been made in the revised manuscript.

- **L181: and: should maybe be changed to “, which” or “that”?**

We have changed the word choice to “which” in the revised manuscript.

- **L224: parameters → parameters’**

This change has been made in the revised manuscript.

- **L225: are → is**

This change has been made in the revised manuscript.

- **L227: is → are**

This change has been made in the revised manuscript.

- **L231: is → was**

This change has been made in the revised manuscript.

- **L232: The wording here is a bit dense. Perhaps better: “which makes the MCMC algorithm more computationally efficient.”**

This change has been made in the revised manuscript.

- **Caption Table 3: Not clear what “in the records of [the] fused CO<sub>2</sub> experiment” means here. Perhaps just “for the fused CO<sub>2</sub> experiment”? Also, “of 95% posterior credible intervals” → “of the 95% credible intervals of the posterior”. The same comment applies to the caption of Table 4 as well. In general, I was a bit confused by the use of “the records of fused CO<sub>2</sub> experiment”, also in the captions of Figures 4 and 5.**

We have changed the description to “fused CO<sub>2</sub> experiment” in the revised manuscript. “Records of fused CO<sub>2</sub>” is an abbreviation of the overarching CO<sub>2</sub> data fusion project, but we agree that the phrase can be confusing out of context. The wording for the credible intervals has been changed in the revised manuscript.

- **Figure 4: Units are missing. Somewhere in the caption it should be made clear that the “mean” is actually the mean difference from the prior for JJA over 2015-2016, rather than the mean flux itself. The label on the lower right panel should be “Interaction” rather than “Interact”.**

The panel label has been changed in the revised manuscript. In addition, the figures now include units for fluxes and flux increments, and the information is included in figure captions.

- **L270: Differences in behaviour, or differences in data coverage?**

Yes, differences in data coverage conveys the message more clearly. We have made this change in the revised manuscript.

- **L283: Missing the word “on” (carried out on the inversions)?**

Yes, this has been corrected in the revised manuscript.

- **L315-316: Really? The probability that the difference across years was larger than the aggregation method effect did not exceed 0.6. This does not convince me that using such a fused product provides internally consistent information for analyzing e.g. interannual variability in fluxes. Perhaps I have misunderstood something.**

This is a fair point, particularly on the interannual effect aspect. In the revised manuscript, we have modified this discussion to highlight the contrast in spatial coherence of these components. We have further noted the challenge of detecting year-to-year differences of the magnitude seen in this



example. Even so, the estimated year-to-year differences can stand on their own as an interannual difference averaged across the aggregation methods. With respect to the aggregation methods, our intent is to characterize the differences due to the method and to highlight impacts on additional inferences from the flux estimates.

- **L339-340: Is the word “variance” (or something else) missing? i.e. “Alternative parameterizations with heterogeneous variance across space could be developed.”**

Yes, this has been corrected in the revised manuscript.

- **Supplement L32: model → models**

This change has been made in the revised supplement.

## References

Cressie, N., Bertolacci, M., & Zammit-Mangion, A. (2022). From many to one: Consensus inference in a MIP. *Geophys. Res. Lett.*, *49*, e2022GL098277. doi: 10.1029/2022GL098277
